# Supplementary material for: Ensemble design for seasonal climate predictions: Studying extreme Arctic sea ice lows with a rare event algorithm
Source: Copernicus journal article supplement (doi:10.5194/egusphere-2024-3082), 2024-10-10
Supplement: Supplementary file [file egusphere-2024-3082-AC1-supplement.pdf]

## **Author comments**

*Ensemble design for seasonal climate predictions: Studying extreme Arctic sea ice lows with a rare event algorithm*

J.Sauer, G. Zappa, F. Massonnet, F. Ragone

submitted to Earth System Dynamics (ESD) within the Special issue  
“Theoretical and computational aspects of ensemble design,  
implementation, and interpretation in climate science” (EGUSPHERE-  
2024-3082)

January 24, 2025

**Figures for replies to reviewer #3**

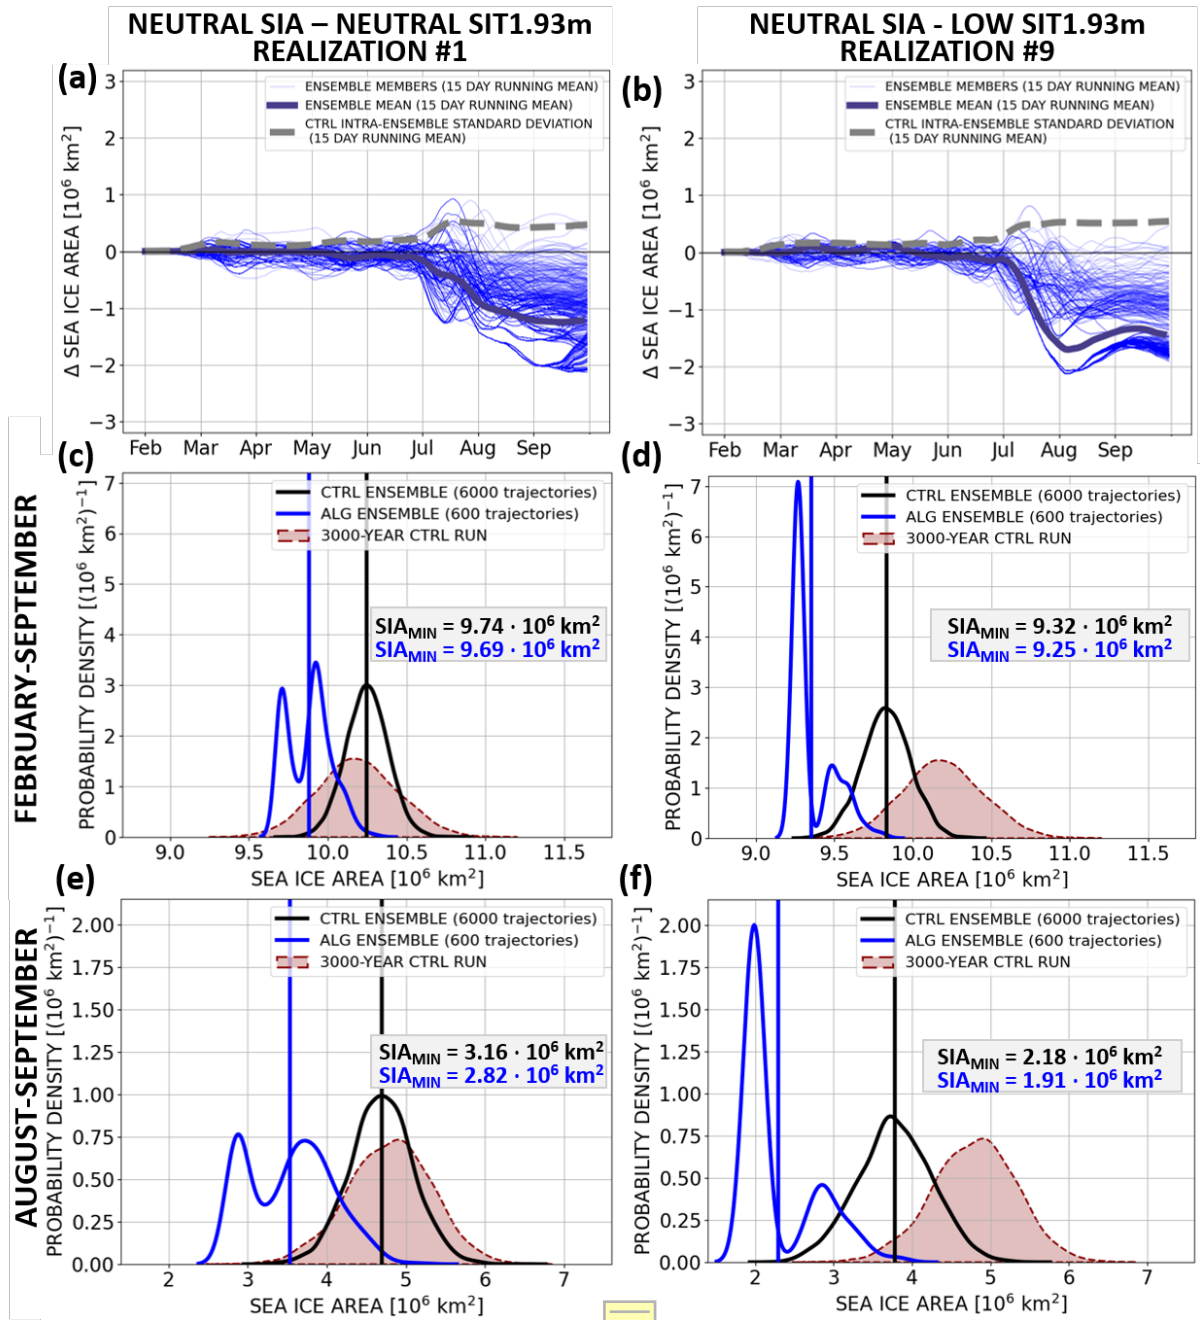

**Figure R1:** Ensemble simulations initialized on 01 February (a,c,e) 1930 and (b,d,f) 1037 of the control run. (a-b) Rare event simulations:  $N=600$  trajectories (thin blue lines) and ensemble mean (thick blue line) of daily pan-Arctic sea ice area anomalies relative to the daily climatology of the corresponding control ensemble means. The gray dashed lines show the intra-ensemble standard deviations in the control ensembles. All lines are presented as 15-day running means. (c-f) Probability distribution functions of (c-d) February-September and (e-f) August-September mean pan-Arctic sea ice area for (blue) the rare event simulation, (black) the control ensembles ( $N=6000$  trajectories) and (red) the 3000-year control run. The vertical lines show the mean of the distributions. The black and blue values indicate the smallest February-September and August-September mean sea ice area value in the control and rare event ensemble simulations respectively.

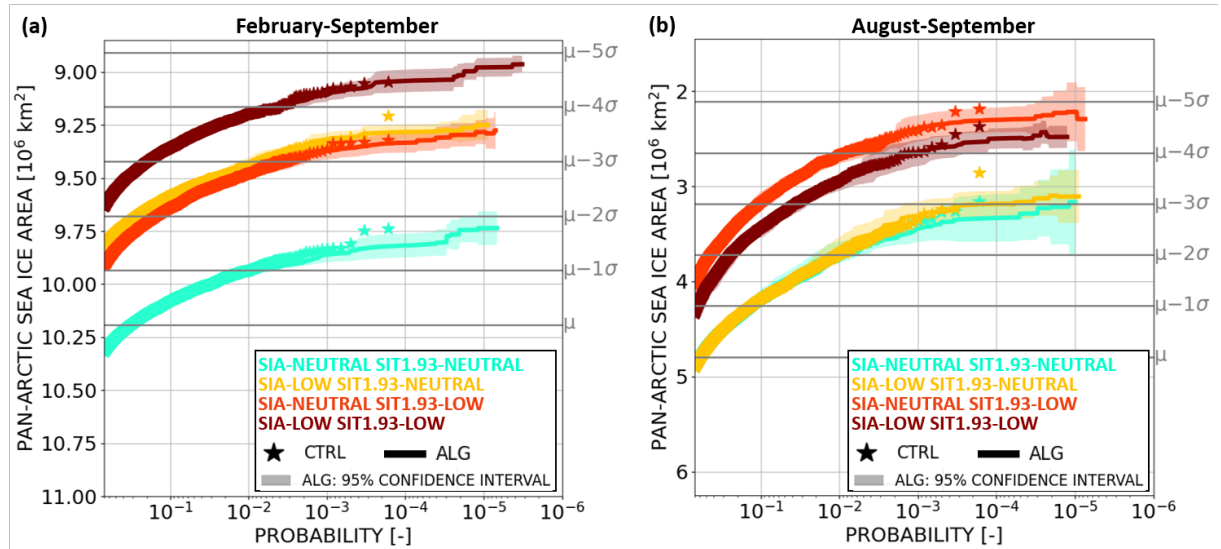

**Figure R2:** Probabilities (x-axes) of (a) February-September and (b) August-September mean sea ice area equal or smaller than a given threshold (y-axes) as a function of four different initial conditions for (stars) the  $N=6000$  trajectory control ensembles (i.e. ten realizations are merged into one single ensemble) and (solid lines) the average over four to ten algorithm estimates. The shading are 95% confidence intervals derived from the t-distribution of the four to ten estimates (see Supplementary Information S4 of the revised manuscript). Note that the y-axes are displayed in reverse order. In the legend, “SIA” and “SIT1.93” indicate the state of the January-February mean anomaly of the pan-Arctic sea ice area and the cumulative area with sea ice thickness equal or larger than 1.93 m respectively. The grey labels on the right of each panel show how many standard deviations a sea ice area value is below the mean of the 3000-year control run.

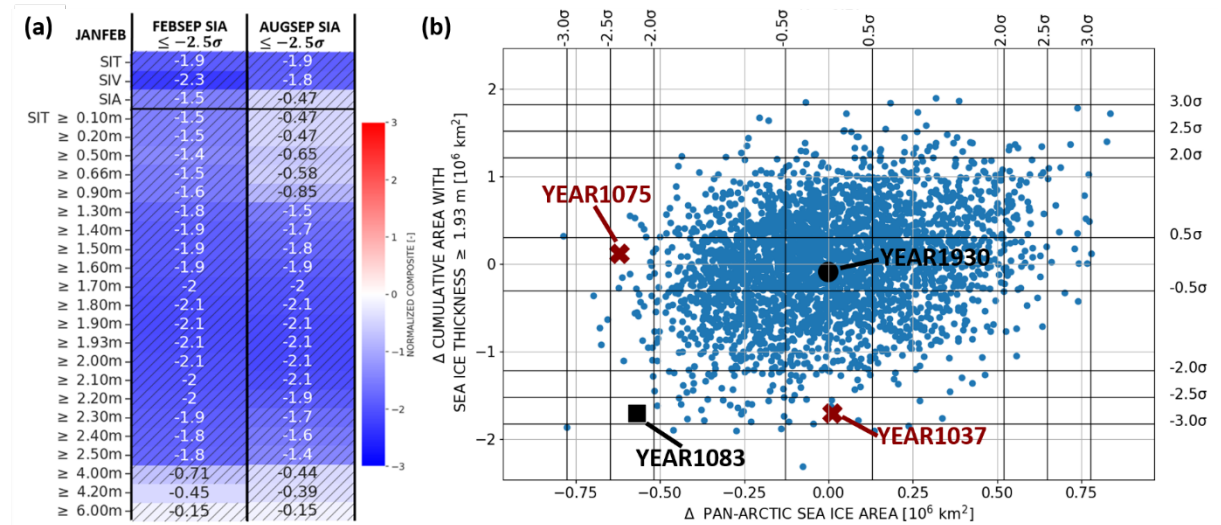

**Figure R3:** PlaSim-LSG 3000-year control run (Sauer et al. [2024]): (a) Normalized mean anomalies of January-February mean quantities conditional on extreme negative (left) February-September (FEBSEP) and (right) August-September (AUGSEP) mean pan-Arctic sea ice area anomalies equal or smaller than  $-2.5$  standard deviations. “SIV”, “SIA” and “SIT” are the pan-Arctic sea ice volume, sea ice area and mean sea ice thickness. “SIT  $\geq$  threshold” are anomalies in the cumulative area with sea ice thickness equal or larger than a critical threshold. Hatching denotes statistical significance at the 5% level assessed from a two-sided t-test applied to five composite estimates after subdividing the 3000-year control run into five 600-member ensembles (see Supplementary Information S4 of the revised manuscript). (b) Scatter plot of January-February mean anomalies of SIT1.93 vs. pan-Arctic sea ice area including the years from the selected initial conditions.

## References

Plotkin, D. A., Webber, R. J., O'Neill, M. E., Waere, J., and Abbot, D. S.: Maximizing simulated tropical cyclone intensity with action minimization, *Journal of Advances in Modeling Earth Systems*, 11, 863–891, <https://doi.org/10.1029/2018ms001419>, 2019.

Sauer, J., Demaeyer, J., Zappa, G., Massonnet, F., and Ragone, F.: Extremes of summer Arctic sea ice reduction investigated with a rare event algorithm, *Climate Dynamics*, pp. 1–19, <https://doi.org/10.1007/s00382-024-07160-y>, 2024.
