# Supplementary material for: Ensemble design for seasonal climate predictions: Studying extreme Arctic sea ice lows with a rare event algorithm
Source: Copernicus journal article supplement (doi:10.5194/egusphere-2024-3082), 2024-10-10
Supplement: Supplementary file [file egusphere-2024-3082-AC2-supplement.pdf]

## **Author comments**

*Ensemble design for seasonal climate predictions: Studying extreme Arctic sea ice lows with a rare event algorithm*

J.Sauer, G. Zappa, F. Massonnet, F. Ragone

submitted to Earth System Dynamics (ESD) within the Special issue  
“Theoretical and computational aspects of ensemble design,  
implementation, and interpretation in climate science” (EGUSPHERE-  
2024-3082)

January 24, 2025

**Figures for replies to reviewer #2**

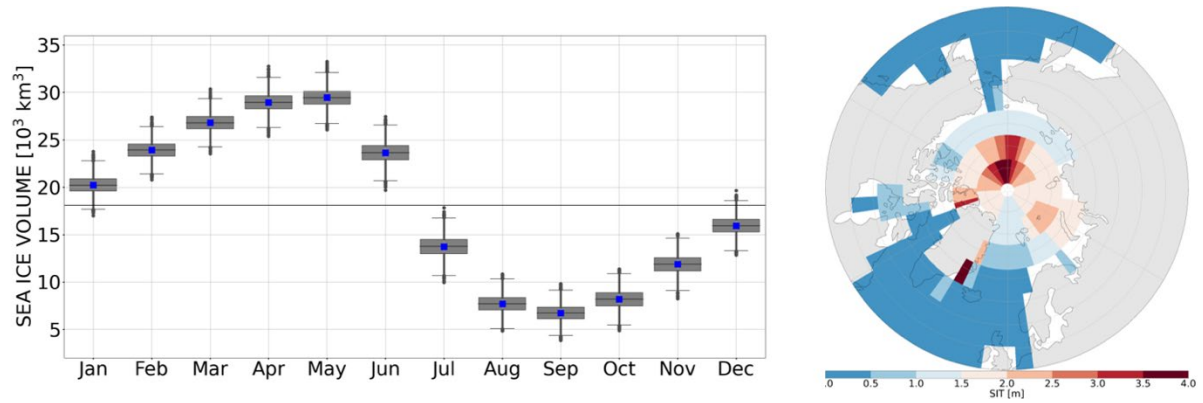

**Figure R1:** Model years 501-3500 of PlaSim-LSG control run [Sauer et al. 2024]: (a) Distributions of monthly mean pan-Arctic sea ice volume [ $10^3 \text{ km}^3$ ] with respect to the 3000 control run model years. The averages and medians are given by the blue squares and the horizontal lines in the boxes. The boxes denote interquartile ranges and the maximum whisker length is defined as 1.5 times the interquartile range. The horizontal gray line shows the annual mean pan-Arctic sea ice volume. (b) Annual mean sea ice thickness [m].

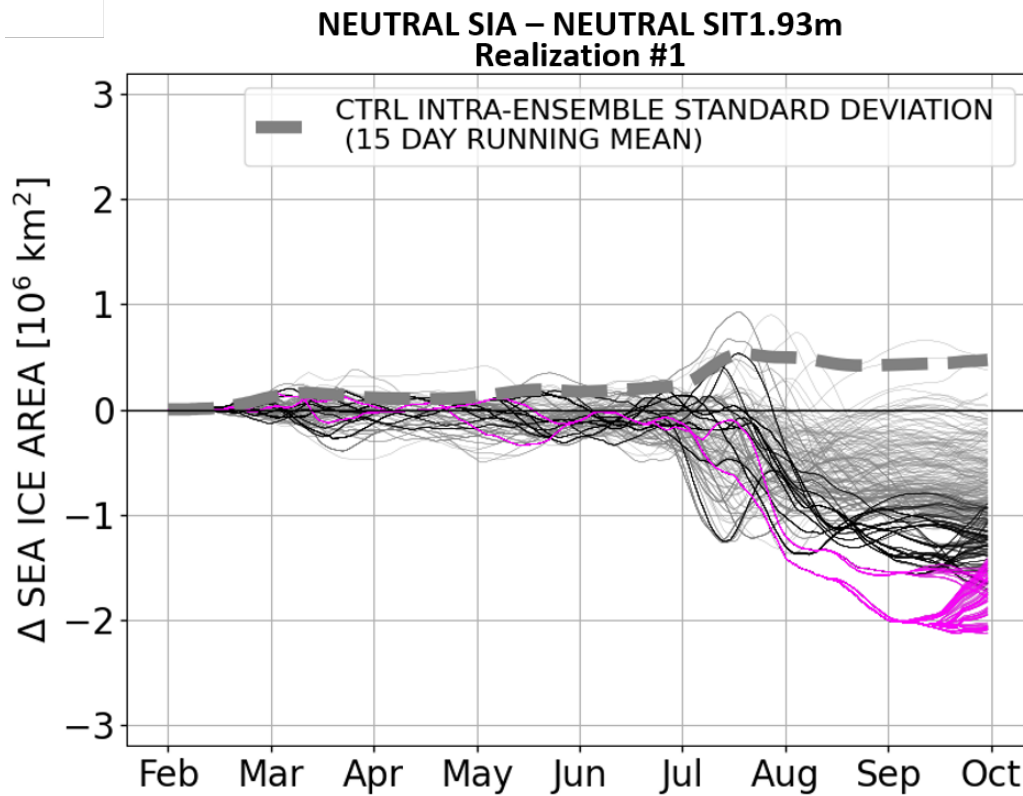

**Figure R2:** Rare event ensemble simulations initialized on 01 February 1930 of the control run. 15-day running mean of daily pan-Arctic sea ice area anomalies [ $10^6 \text{ km}^2$ ] relative to the control ensemble mean. The magenta lines show trajectories leading to the lower peak of the bimodal distribution of Figure 2(e) of the main manuscript and the dark black lines the trajectories leading to August-September mean sea ice area anomalies below -2.5 control ensemble standard deviations excluding the lowest peak. The gray dashed line shows the 15-day running mean of the intra-ensemble standard deviation.

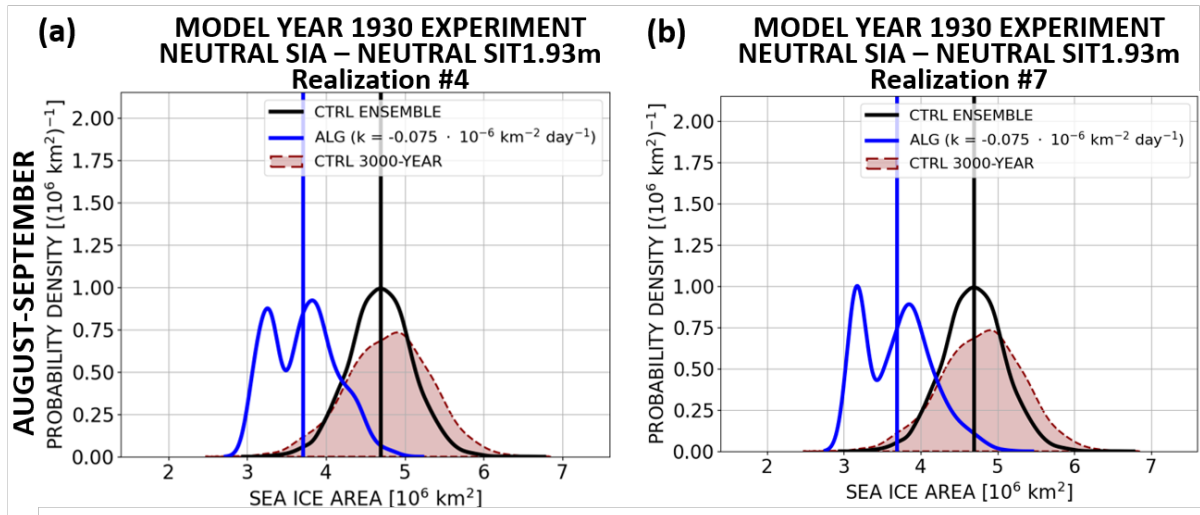

**Figure R3:** Ensemble simulations initialized on 01 February 1930 of the control run. August-September mean pan-Arctic sea ice area for (blue) the rare event simulation, (black) the control ensembles ( $N=6000$  trajectories) and (red) the 3000-year control run for (a) rare event simulation realization #4 and (b) rare event simulation realization #7. The vertical lines show the mean of the distributions. The black and blue values indicate the smallest August-September mean sea ice area value in the control and rare event ensemble simulations respectively.

# MODEL YEAR 1930 EXPERIMENT: NEUTRAL SIA – NEUTRAL SIT1.93m REALIZATION #1

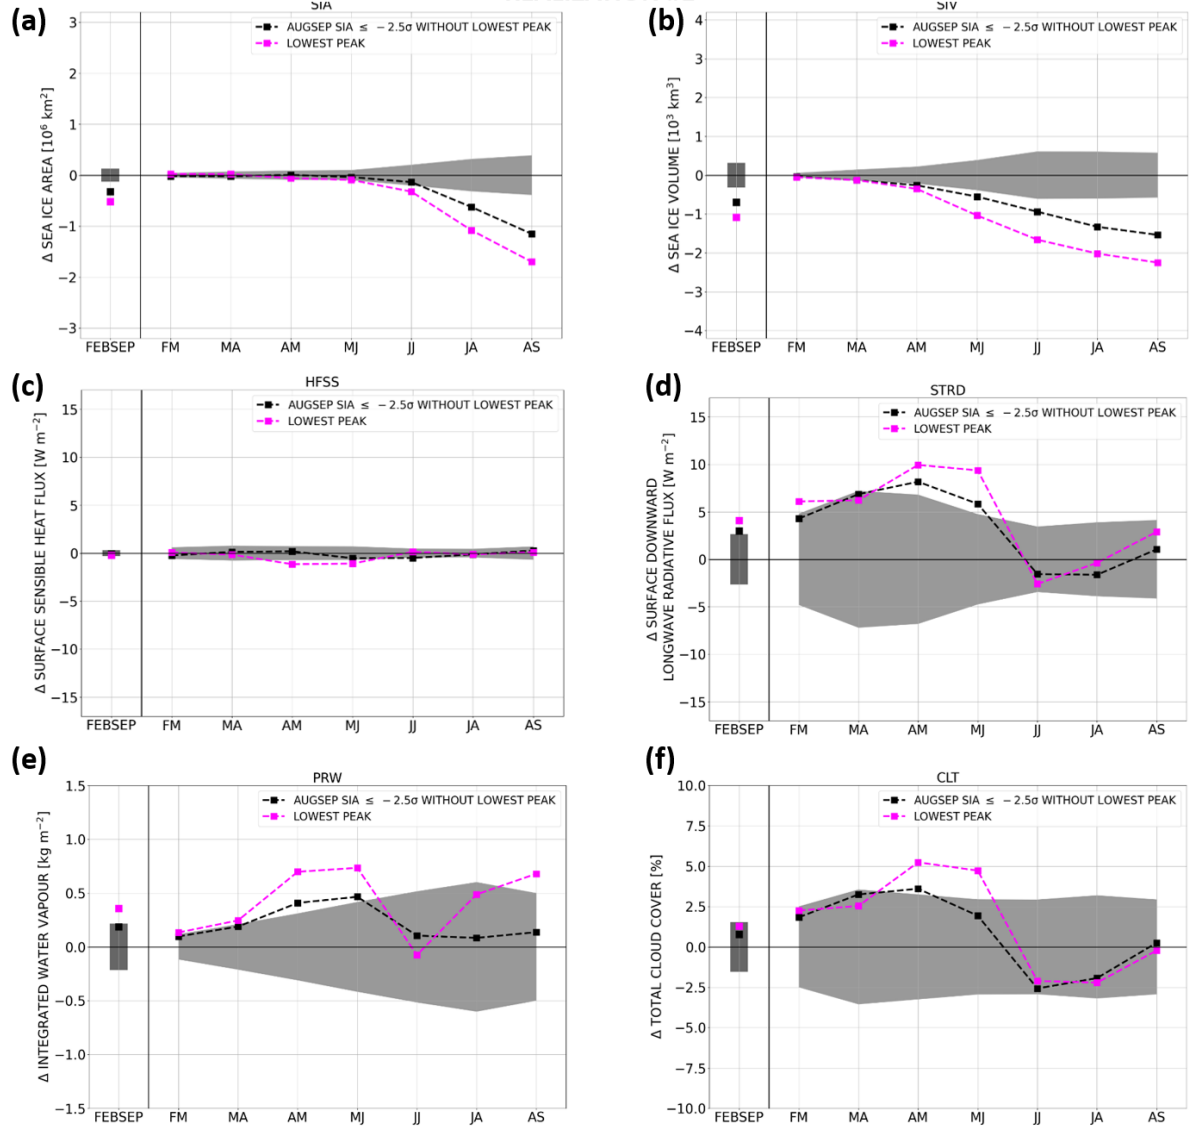

**Figure R4:** Rare event simulation realization #1 starting from a neutral winter initial condition. Composite mean anomalies of different quantities for all trajectories leading to an August-September mean sea ice area value belonging to (magenta) the "lower peak" of the rare event algorithm probability distribution function of Figure 2(e) and (black) for all trajectories leading to an August-September mean sea ice area anomaly equal or smaller than  $-2.5\sigma$  of the control ensemble excluding the magenta trajectories (see Figure S4 for the selected trajectories). The composites are computed using the estimator in Equation (3) of the main manuscript (see Sauer et al. [2024] for details about the computation of composites with the output of the algorithm). (a-b) Pan-Arctic sea ice (a) area and (b) volume. (c-d) Spatially averaged composite mean anomalies over all ocean grid boxes northern of  $70^\circ \text{ N}$ . (c) Surface sensible heat flux and ( $\text{W m}^{-2}$ ; positive averaged upwards) (d) downward longwave radiative flux anomalies [ $\text{W m}^{-2}$ ] (Direction-independent absolute values of the downward and upward fluxes are considered, i.e., a positive (negative) anomaly indicates a radiative flux that is stronger (weaker) in magnitude than the climatology). (e) Integrated water vapour [ $\text{kg m}^{-2}$ ] and (f) total cloud cover [%] anomalies. (a-f) Shading indicates the intra-ensemble standard deviation of the control ensemble and anomalies are computed with respect to the climatology of the control ensemble.

## References

- Lindsay, R. W., Zhang, J., Schweiger, A., Steele, M., and Stern, H.: Arctic Sea Ice Retreat in 2007 Follows Thinning Trend, *Journal of Climate*, 22, 165–176, <https://doi.org/10.1175/2008JCLI2521.1>, 2009.
- Guemas, V., Doblas Reyes, F., Germe, A., Chevallier, M., and y Melia, D. S.: September 2012 Arctic sea ice minimum: Discriminating between sea ice memory, the August 2012 extreme storm, and prevailing warm conditions [in “Explaining Extreme Events of 2012 from a Climate Perspective”], *Bull. Amer. Meteor. Soc.*, 94, S20–S22, 2013.
- Sauer, J., Demaeyer, J., Zappa, G., Massonnet, F., and Ragone, F.: Extremes of summer Arctic sea ice reduction investigated with a rare event algorithm, *Climate Dynamics*, pp. 1–19, <https://doi.org/10.1007/s00382-024-07160-y>, 2024.
- Tian, T., Y. Shuting, M. P. Karami, F. Massonnet, T. Kruschke and T. Koenigk.: Benefits of sea ice initialization for the interannual-to-decadal climate prediction skill in the Arctic in EC-Earth3, *Geoscientific Model Dev.* 14, pp. 4283–4283, <https://doi.org/10.5194/gmd-14-4283-2021>, 2021.
- Chevallier, M. and Salas-Melia, D.: The role of sea ice thickness distribution in the Arctic sea ice potential predictability: A diagnostic approach with a coupled GCM, *Journal of Climate*, 25, 3025–3038, <https://doi.org/10.1175/JCLI-D-11-00209.1>, 2012.
- Ragone, F. and Bouchet, F.: Rare event algorithm study of extreme warm summers and heatwaves over Europe, *Geophysical Research Letters*, 48, e2020GL091197, <https://doi.org/10.1029/2020GL091197>, 2021.
- Chevallier, M., F. Massonnet, H. Goessling, V. Guémas, and J. Thomas: The Role of Sea Ice in Sub-seasonal Predictability: *SUB-SEASONAL TO SEASONAL PREDICTION: The Gap Between weather and Climate Forecasting*, A. W. Robertson and F. Vitart, eds., Elsevier Inc., 201–221, 2019.
- Kapsch, M.-L., Skific, N., Graversen, R. G., Tjernström, M., and Francis, J. A.: Summers with low Arctic sea ice linked to persistence spring atmospheric circulation patterns, *Climate Dynamics*, 52, 2497–2512, <https://doi.org/10.1007/s00382-018-4279-z>, 2019.
- Parkinson, C. L. and Comiso, J.: On the 2012 record low Arctic sea ice cover: Combined impact of preconditioning and an August storm, *Geophysical Research Letters*, 40, 1356–1361, <https://doi.org/10.1002/grl.50349>, 2013.
